# Supplementary material for: Effect of genomic selection and genotyping strategy on estimation of variance components in animal models using different relationship matrices
Source: PubMed Central journal article supplement (PMC7291515; doi:10.1186/s12711-020-00550-w), 2020-06-11

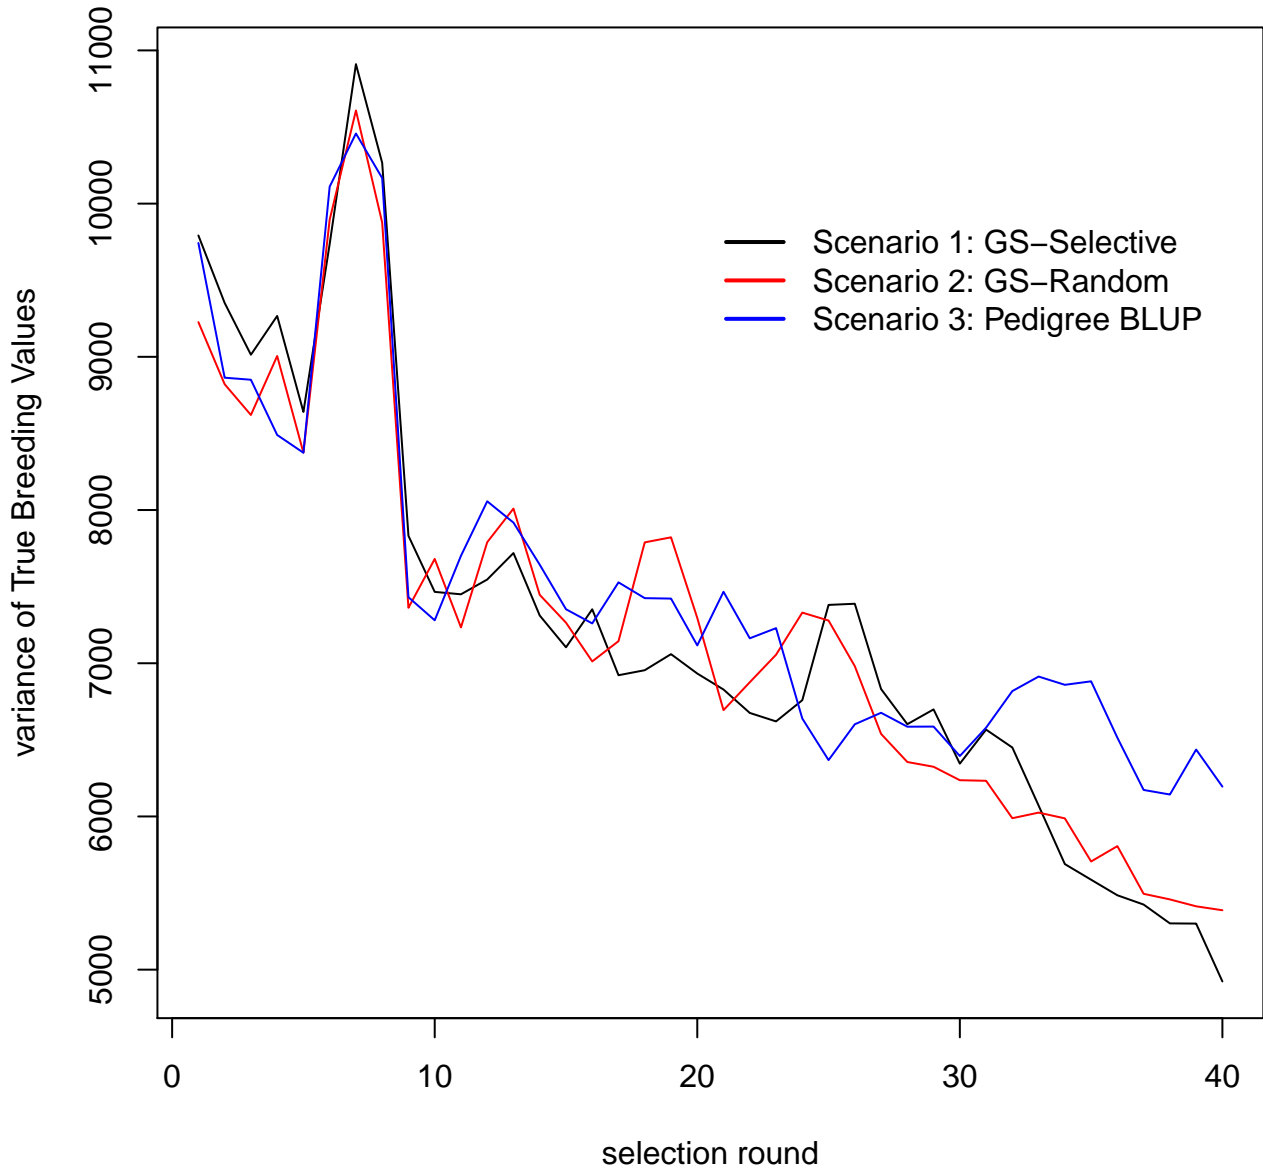

Supplement: 12711_2020_550_MOESM1_ESM.pdf [file 12711_2020_550_MOESM1_ESM.pdf]
